# Supplementary material
Source: PubMed Central journal article supplement (PMC2868445)
Supplement: supp_51_2_960__1.pdf [file supp_51_2_960__1.pdf]

**Supplementary Table S1.**

| <b>Primary Antibodies</b>            |                                                          |                         |                               |                                      |                                       |
|--------------------------------------|----------------------------------------------------------|-------------------------|-------------------------------|--------------------------------------|---------------------------------------|
| <b>Specificity</b>                   | <b>Used to Label</b>                                     | <b>Source (Isotype)</b> | <b>Clone</b>                  | <b>Company</b>                       | <b>Working Concentration</b>          |
| Collagen IV                          | Basal Lamina                                             | Rabbit IgG              | Polyclonal                    | Abcam Inc.<br>Cambridge, UK          | 12.0 µg/mL                            |
| ED1 (CD68)                           | Macrophages,<br>Monocytes                                | Mouse IgG <sub>1</sub>  | ED1                           | Abcam Inc.<br>Cambridge, UK          | 5.0 µg/mL                             |
| Glial Fibrillary Acid Protein (GFAP) | Astrocytes,<br>Müller Glia                               | Rabbit                  | Polyclonal                    | Dako UK Ltd., Ely,<br>UK             | Initial conc. N/A<br>Dilution = 1:500 |
| Glial Fibrillary Acid Protein (GFAP) | Astrocytes,<br>Müller Glia                               | Mouse IgG <sub>1</sub>  | G-A-5                         | Sigma Inc., St. Louis,<br>MO, USA    | Initial conc. N/A<br>Dilution = 1:200 |
| Glutamine Synthetase                 | Astrocytes,<br>Müller Glia                               | Rabbit IgG              | Polyclonal                    | Sigma Inc., St. Louis,<br>MO, USA    | 0.27 µg/mL                            |
| Green Fluorescent Protein (GFP)      | GFP <sup>+</sup> MSCs                                    | Chicken IgY             | Polyclonal                    | Chemicon Inc.,<br>Temecula, CA, USA  | 2.0 µg/mL                             |
| Laminin                              | Basal Lamina                                             | Rabbit                  | Polyclonal                    | Sigma Aldrich, St.<br>Louis, MO, USA | Initial conc. N/A<br>Dilution = 1:100 |
| Nestin                               | Astrocytes,<br>Müller Glia                               | Mouse IgG <sub>1</sub>  | Rat-401                       | Chemicon Inc.,<br>Temecula, CA, USA  | 2.75 µg/mL                            |
| Neuronal Nuclei (NeuN)               | RGCs,<br>Amacrine cells                                  | Mouse IgG <sub>1</sub>  | NeuN                          | Chemicon Inc.,<br>Temecula, CA, USA  | 5.0 µg/mL                             |
| Vimentin                             | Astrocytes,<br>Müller Glia                               | Chicken IgY             | Polyclonal                    | Chemicon Inc.,<br>Temecula, CA, USA  | 0.5 µg/mL                             |
| β-III-Tubulin                        | Retinal<br>ganglion cells<br>(RGCs)                      | Mouse IgG <sub>1</sub>  | 5G8                           | Promega, Inc.,<br>Madison, WI, USA   | 0.5 µg/mL                             |
| <b>Secondary Antibodies</b>          |                                                          |                         |                               |                                      |                                       |
| <b>Specificity</b>                   | <b>Conjugate</b>                                         | <b>Source</b>           | <b>Company</b>                | <b>Working Concentration</b>         |                                       |
| Chicken IgY                          | AlexaFluor 488 or<br>AlexaFluor 568                      | Goat                    | Invitrogen, Carlsbad, CA, USA | 2.0 µg/mL                            |                                       |
| Mouse IgG (H+L)                      | AlexaFluor 488 or<br>AlexaFluor 568 or<br>AlexaFluor 647 | Goat                    | Invitrogen, Carlsbad, CA, USA | 2.0 µg/mL                            |                                       |
| Rabbit IgG (H+L)                     | AlexaFluor 488 or<br>AlexaFluor 568                      | Goat                    | Invitrogen, Carlsbad, CA, USA | 2.0 µg/mL                            |                                       |

**Supplementary Table S1. Details of antibodies used for immunohistochemistry.**
